# Supplementary material for: Contribution of Second Trimester Sonographic Placental Morphology to Uterine Artery Doppler in the Prediction of Placenta-Mediated Pregnancy Complications
Source: MDPI journal article supplement (doi:10.3390/jcm11226759), 2022-11-15
Supplement: s1 [file s1]

## Supplementary Material

**Supplemental Table S1: Median values of placental sonographic markers by week**

| <b>Gestational week</b> | <b>N</b> | <b>Length (cm)</b> | <b>Width (cm)</b> | <b>Thickness (cm)</b> | <b>Area (cm<sup>2</sup>)</b> | <b>Volume (cm<sup>3</sup>)</b> | <b>Mean uterine artery PI</b> |
|-------------------------|----------|--------------------|-------------------|-----------------------|------------------------------|--------------------------------|-------------------------------|
| 16                      | 43       | 11.72              | 10.22             | 2.40                  | 120.48                       | 304.42                         | 1.30                          |
| 17                      | 15       | 13.02              | 11.35             | 2.57                  | 147.10                       | 369.68                         | 1.21                          |
| 18                      | 18       | 13.13              | 11.75             | 2.60                  | 156.04                       | 404.38                         | 1.14                          |
| 19                      | 67       | 14.00              | 12.47             | 2.57                  | 177.06                       | 446.35                         | 1.07                          |
| 20                      | 42       | 15.17              | 13.22             | 2.63                  | 198.15                       | 539.73                         | 0.97                          |
| 21                      | 70       | 15.17              | 13.22             | 2.63                  | 198.15                       | 539.73                         | 0.97                          |
| 22                      | 96       | 15.37              | 13.38             | 2.77                  | 206.55                       | 566.80                         | 1.00                          |
| 23                      | 47       | 16.03              | 14.05             | 2.93                  | 231.51                       | 628.05                         | 0.98                          |
| 24                      | 31       | 16.50              | 14.25             | 3.17                  | 238.89                       | 679.37                         | 0.98                          |

PI, pulsatility index

Values are derived from the overall study cohort of 429 women who underwent sonographic placental study using the same protocol employed in the current study.
